# Supplementary material for: Polymerizable rotaxane hydrogels for three-dimensional printing fabrication of wearable sensors
Source: Springer Nature journal article supplement (doi:10.1038/s41467-023-36920-3), 2023-03-10
Supplement: MOESM1 [file 41467_2023_36920_MOESM1_ESM.pdf]

## **Supplementary Information**

### **Polymerizable rotaxane hydrogels for three-dimensional printing fabrication of wearable sensors**

Xueru Xiong, Yunhua Chen, Zhenxing Wang, Huan Liu, Mengqi Le, Caihong Lin, Gang Wu,  
Lin Wang\*, Xuetao Shi\*, Yong-Guang Jia\*, Yanli Zhao\*

\*Corresponding authors. Email: wanglin3@scut.edu.cn (L.W.); shxt@scut.edu.cn (X.S.);  
ygjia@scut.edu.cn (Y.G.J.); zhaoyanli@ntu.edu.sg (Y.Z.)

#### **This PDF file includes:**

Supplementary Figs. 1 to 22

Supplementary Table 1

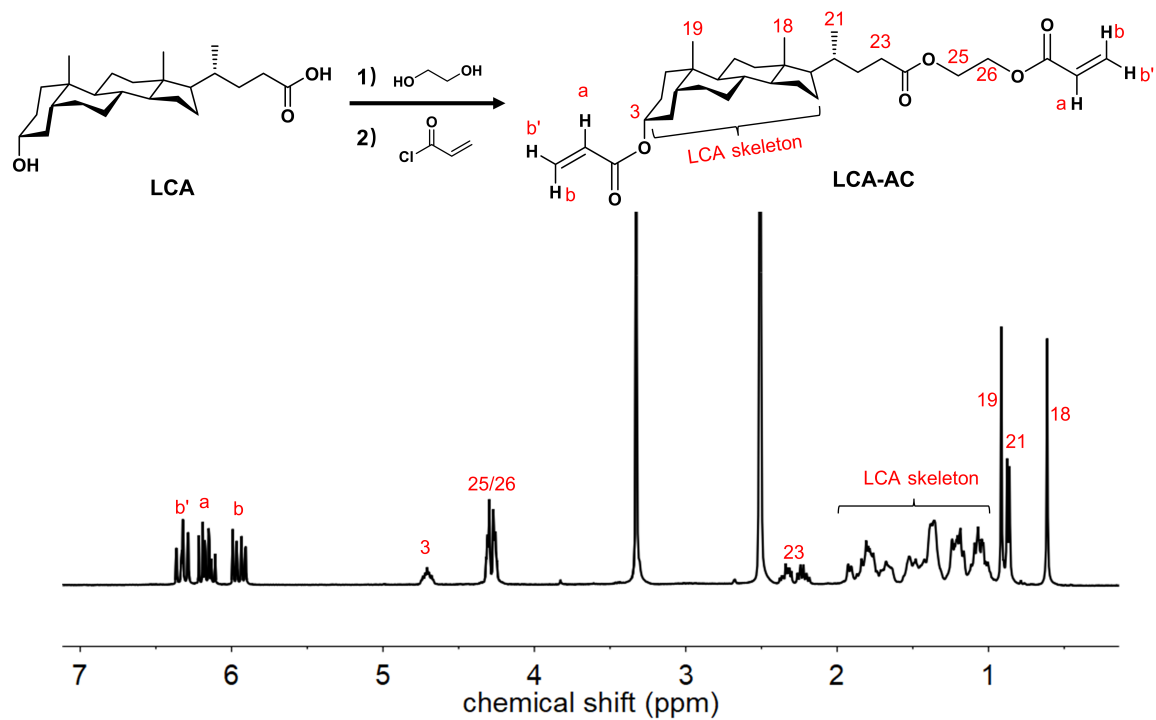

**Supplementary Fig. 1.** Synthesis route of LCA-AC and its <sup>1</sup>H NMR spectrum obtained in DMSO-d<sub>6</sub> as well as the assignments of peaks.

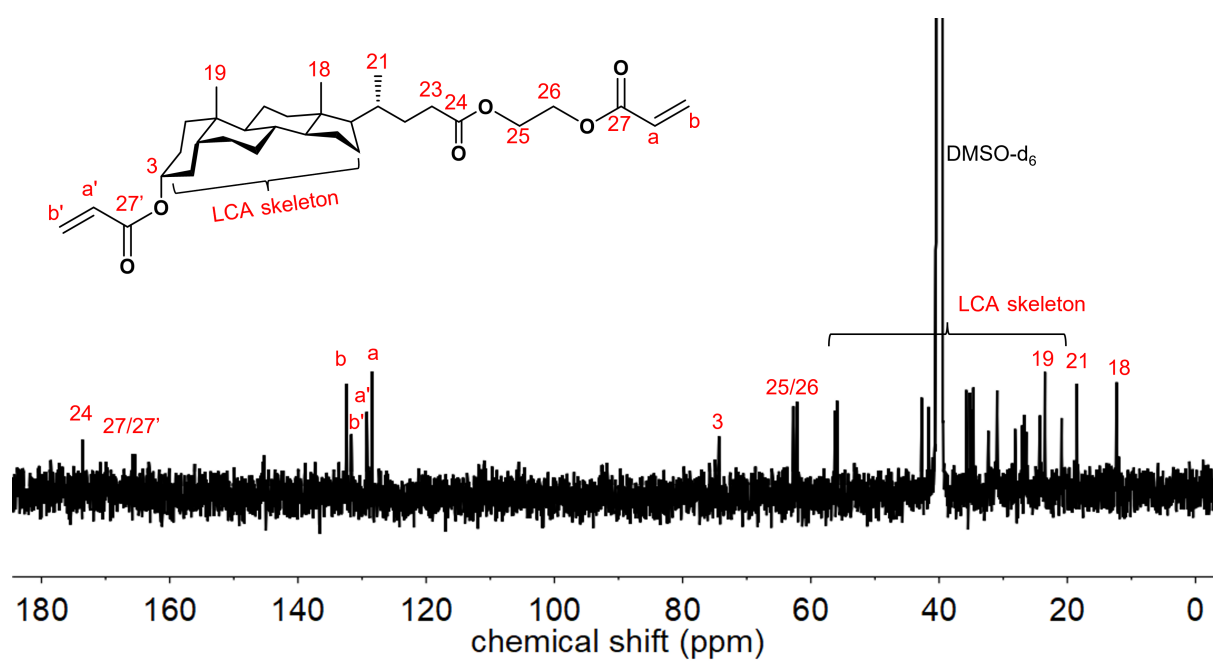

**Supplementary Fig. 2.**  $^{13}\text{C}$  NMR spectrum of LCA-AC obtained in  $\text{DMSO-d}_6$  and the assignments of peaks.

**Acquisition Parameter**

|             |          |                      |          |                  |           |
|-------------|----------|----------------------|----------|------------------|-----------|
| Source Type | ESI      | Ion Polarity         | Positive | Set Nebulizer    | 0.6 Bar   |
| Focus       | Active   | Set Capillary        | 3500 V   | Set Dry Heater   | 180 °C    |
| Scan Begin  | 50 m/z   | Set End Plate Offset | -500 V   | Set Dry Gas      | 4.0 l/min |
| Scan End    | 1500 m/z | Set Charging Voltage | 0 V      | Set Divert Valve | Waste     |
|             |          | Set Corona           | 0 nA     | Set APCI Heater  | 0 °C      |

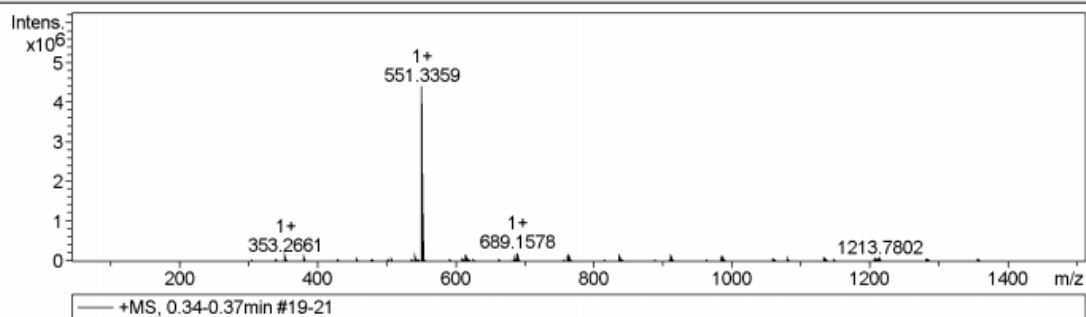

| #  | m/z       | I       | I %   |
|----|-----------|---------|-------|
| 1  | 353.2661  | 121110  | 2.8   |
| 2  | 381.2973  | 81511   | 1.9   |
| 3  | 541.1202  | 108733  | 2.5   |
| 4  | 551.3359  | 4395613 | 100.0 |
| 5  | 552.3388  | 1365252 | 31.1  |
| 6  | 553.3407  | 248691  | 5.7   |
| 7  | 615.1392  | 174537  | 4.0   |
| 8  | 616.1395  | 102343  | 2.3   |
| 9  | 617.1374  | 79083   | 1.8   |
| 10 | 685.4351  | 82173   | 1.9   |
| 11 | 689.1578  | 211996  | 4.8   |
| 12 | 690.1584  | 134668  | 3.1   |
| 13 | 691.1561  | 109614  | 2.5   |
| 14 | 763.1766  | 161506  | 3.7   |
| 15 | 764.1772  | 119152  | 2.7   |
| 16 | 765.1755  | 95956   | 2.2   |
| 17 | 837.1950  | 128005  | 2.9   |
| 18 | 838.1961  | 103395  | 2.4   |
| 19 | 839.1941  | 87623   | 2.0   |
| 20 | 911.2139  | 106331  | 2.4   |
| 21 | 912.2145  | 91365   | 2.1   |
| 22 | 913.2131  | 83984   | 1.9   |
| 23 | 985.2321  | 88440   | 2.0   |
| 24 | 986.2328  | 82975   | 1.9   |
| 25 | 987.2319  | 79595   | 1.8   |
| 26 | 1059.2511 | 74525   | 1.7   |
| 27 | 1060.2521 | 73998   | 1.7   |
| 28 | 1061.2507 | 69812   | 1.6   |
| 29 | 1079.6783 | 84700   | 1.9   |
| 30 | 1213.7802 | 66590   | 1.5   |

**Supplementary Fig. 3.** ESI-HRMS spectrum of LCA-AC. Calculated for  $C_{32}H_{48}NaO_6$ ,  $[M+Na]^+$  551.3349. Found: 551.3359.



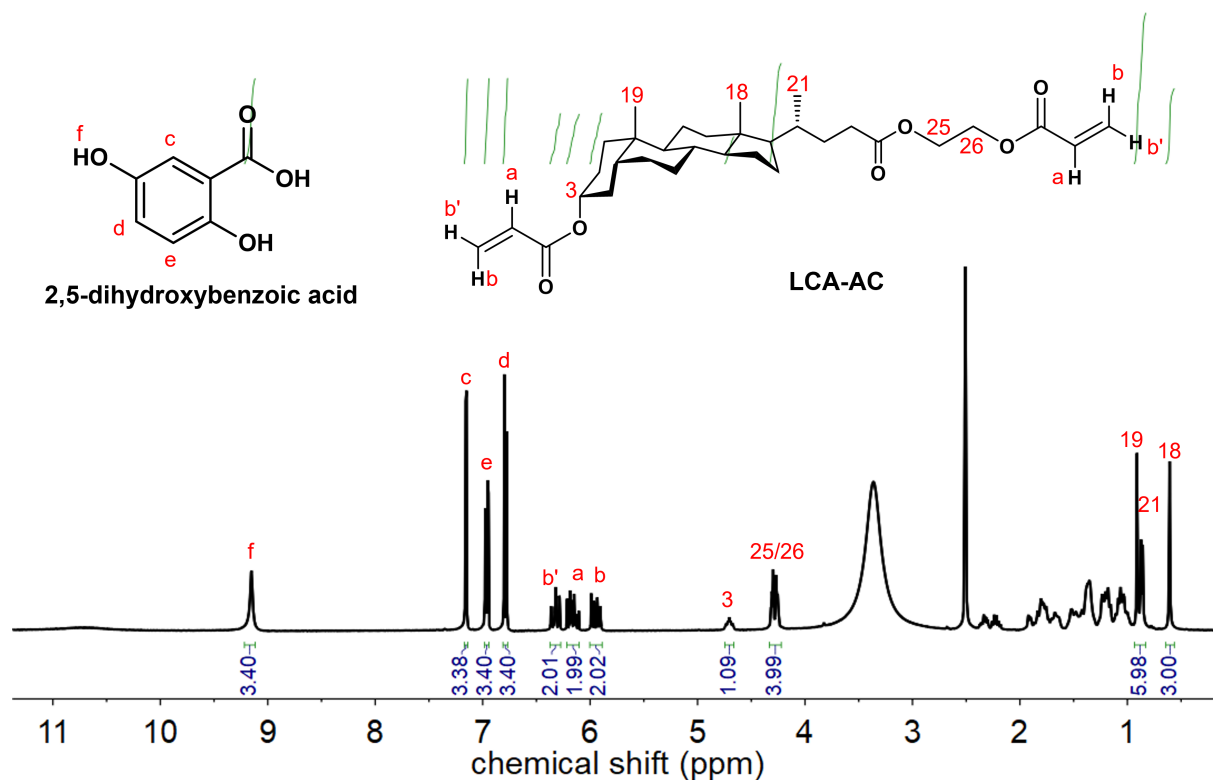

**Supplementary Fig. 4.**  $^1\text{H}$  NMR spectrum of LCA-AC (5.08 mg) mixed with internal standard 2,5-dihydroxybenzoic acid (5.03 mg) in  $\text{DMSO-d}_6$  and the assignments of the related peaks. The purity of LCA-AC was quantified based on the integration ratio of peaks c, d or e to 18 and the content of LCA-AC was calculated to be ca. 98.9%.

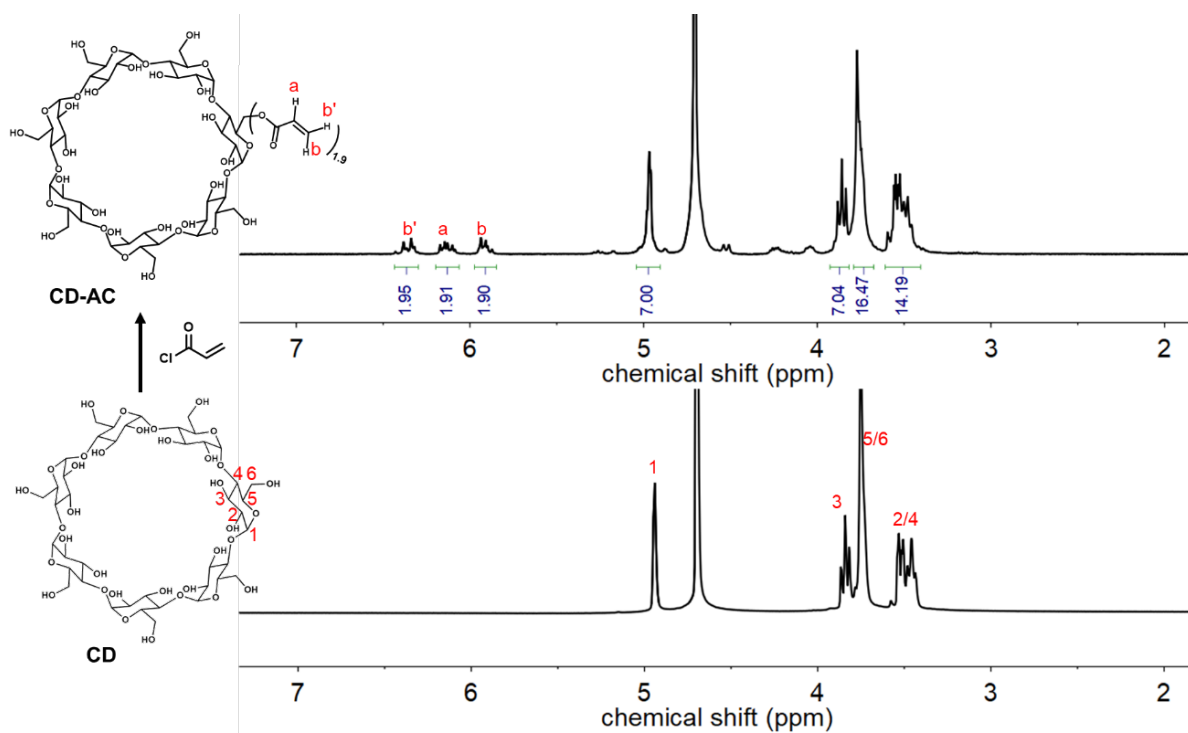

**Supplementary Fig. 5.** Synthesis route of CD-AC and its  $^1\text{H}$  NMR spectrum in  $\text{D}_2\text{O}$  and the assignments of peaks. Acrylate units on each CD-AC were estimated to be ca. 1.91 based on the integration ratio of peaks a, b or b' to peak 1.

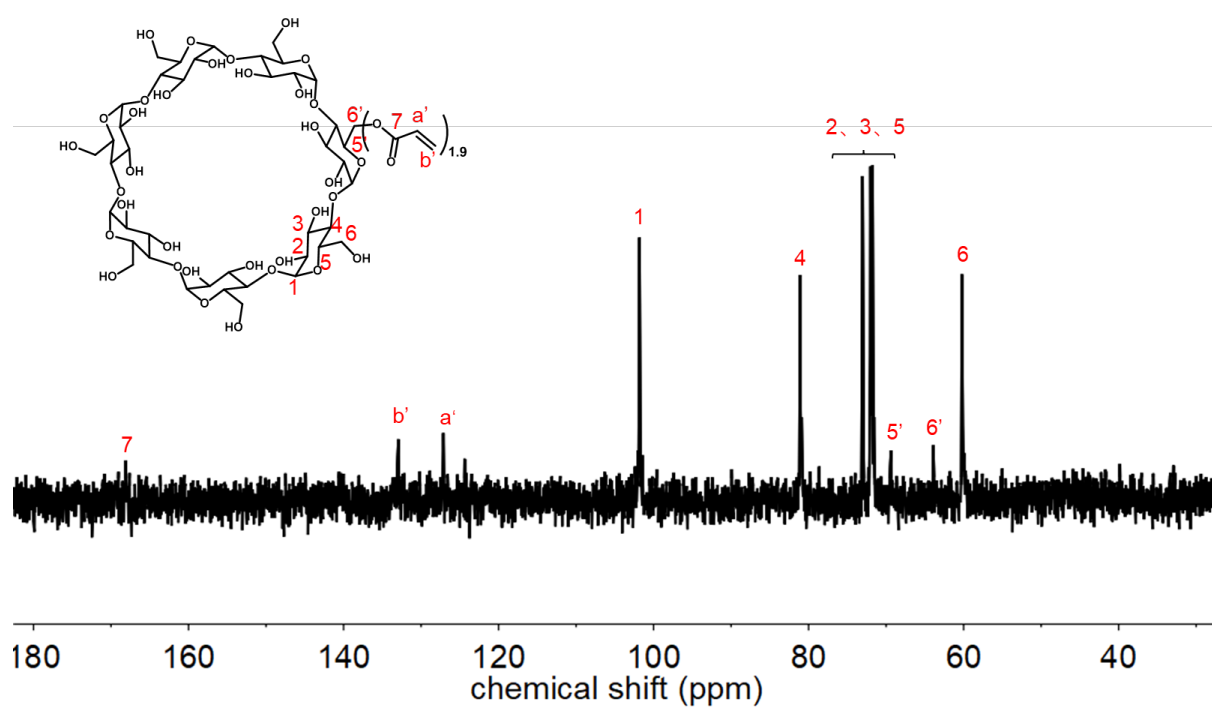

**Supplementary Fig. 6.**  $^{13}\text{C}$  NMR spectrum of CD-AC in  $\text{D}_2\text{O}$  and the assignments of peaks.

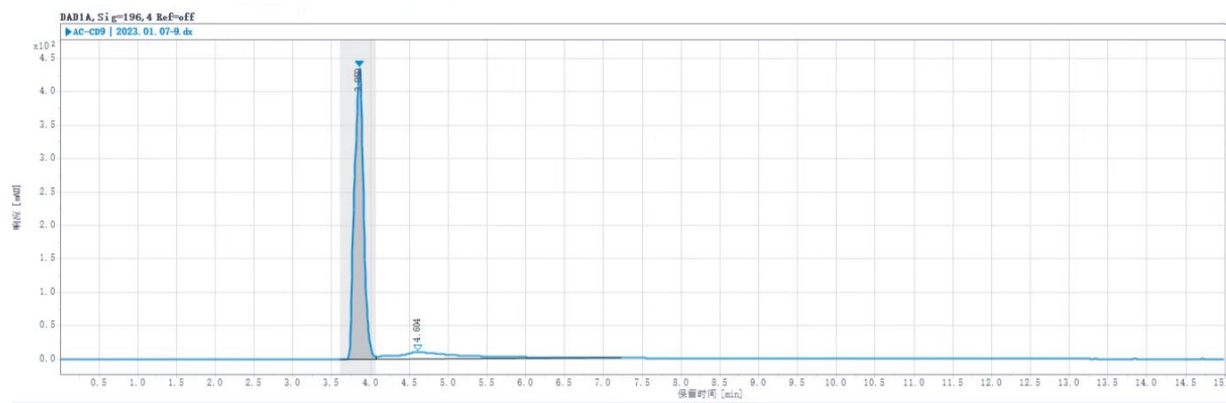

### 进样结果

| # | 名称 | 信号说明                      | RT (min) | 峰面积 (mAU·s) | 峰面积 %  | 峰高 (mAU) | 峰高 %  | 含量 | 浓度 | 开始时间 (min) | 结束时间 (min) |
|---|----|---------------------------|----------|-------------|--------|----------|-------|----|----|------------|------------|
| 1 |    | DAD1A, Sig=196, 4 Ref=off | 3.859    | 3565.261    | 83.800 | 435.676  | 97.64 |    |    | 3.614      | 4.074      |
| 2 |    | DAD1A, Sig=196, 4 Ref=off | 4.604    | 689.208     | 16.200 | 10.508   | 2.36  |    |    | 4.074      | 7.226      |

**Supplementary Fig. 7.** HPLC result of CD-AC further confirming that the purity of diacrylated  $\beta$ -CD in mixture is about 83.8%.

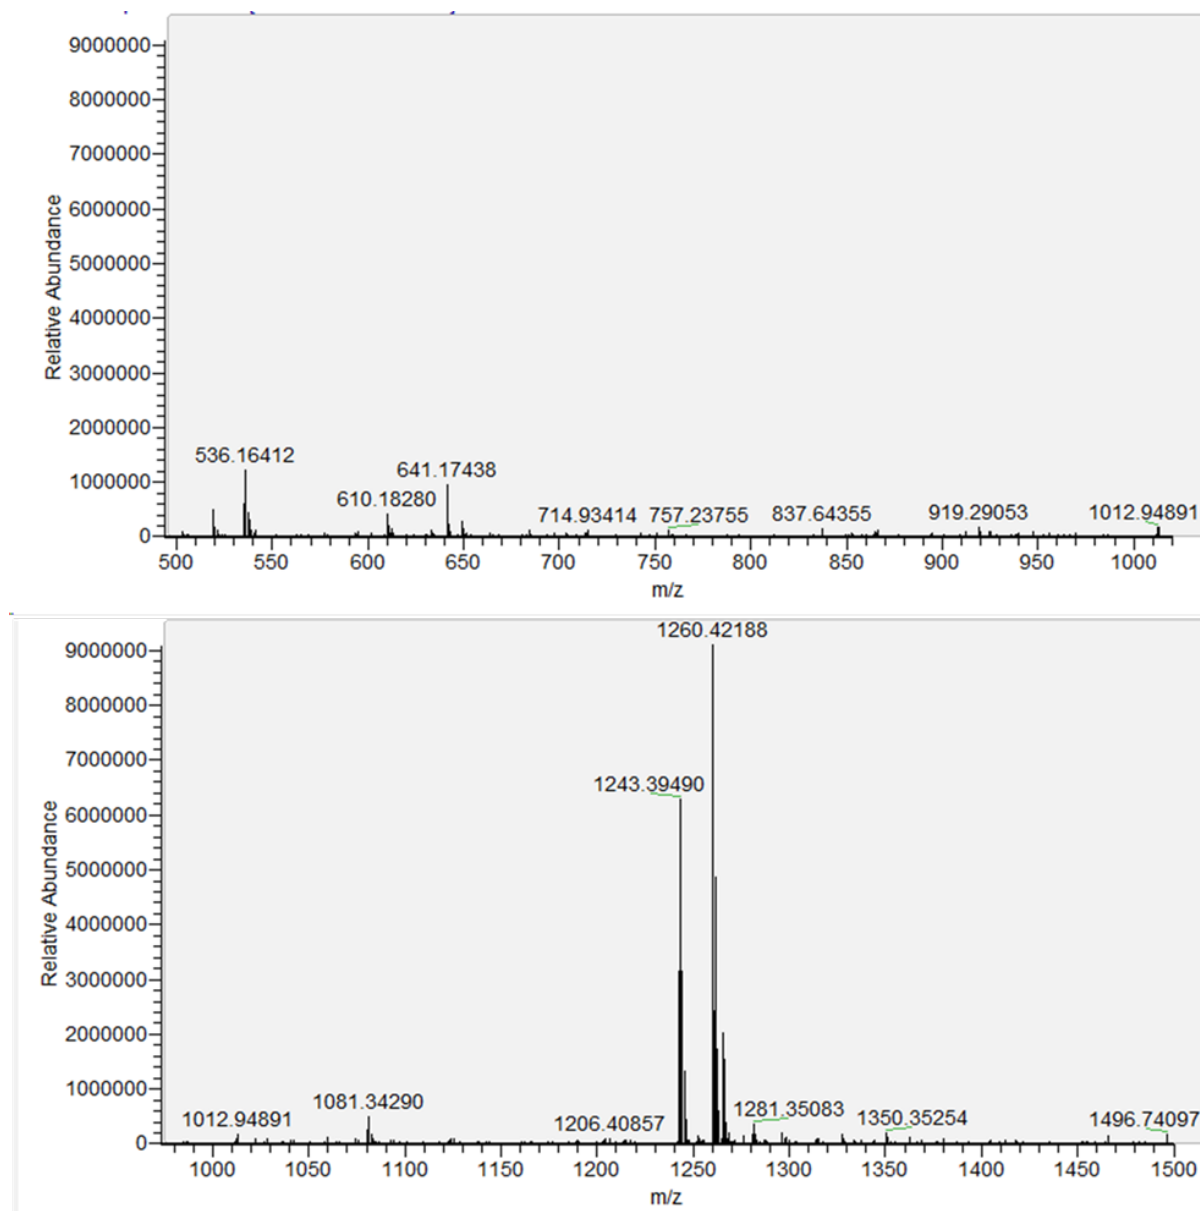

**Supplementary Fig. 8.** ESI-HRMS spectrum of CD-AC indicating that the most abundant component is the diacrylated  $\beta$ -CD. Calculated for diacrylated  $\beta$ -CD:  $C_{48}H_{75}O_{37}$ ,  $[M+H]^+$  1243.3987. Found: 1243.3949.

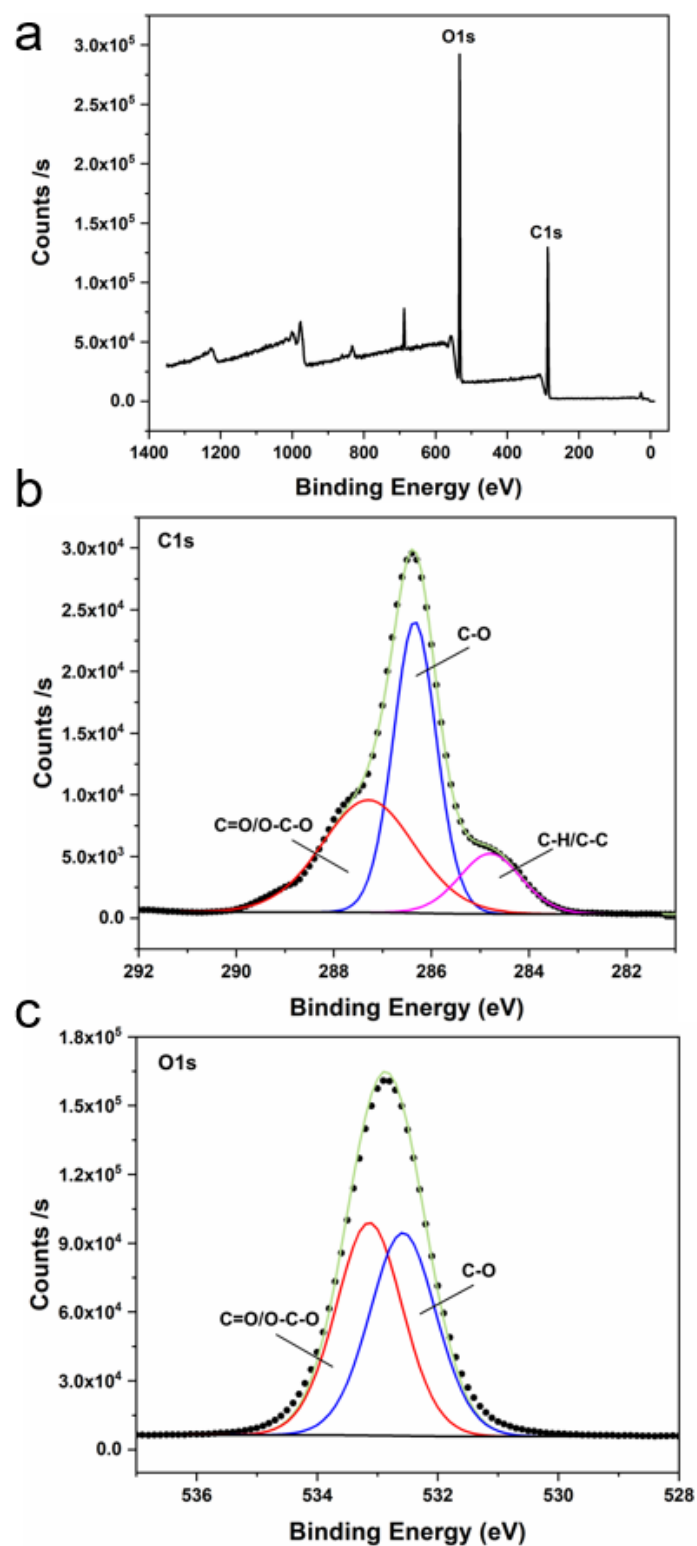

**Supplementary Fig. 9. XPS spectra.** (a) Wide scan XPS spectrum of CD-AC, and (b) C 1s and (c) O 1s XPS spectra of CD-AC.

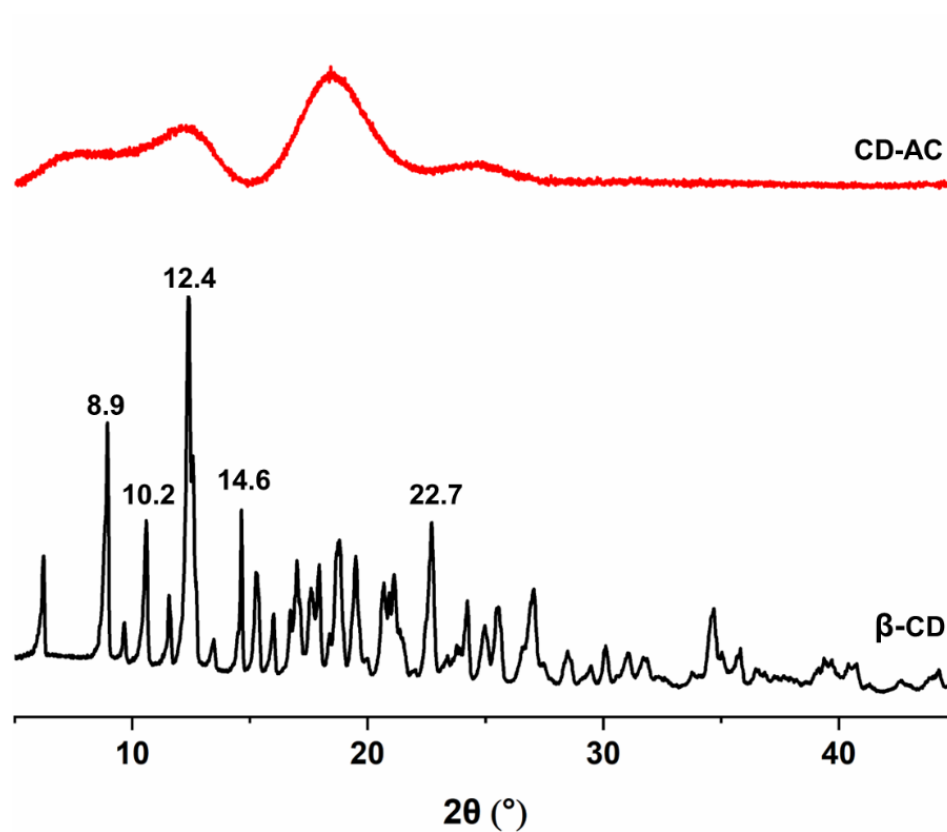

**Supplementary Fig. 10.** Powder XRD patterns of CD-AC and  $\beta$ -CD, indicating CD-AC becomes an amorphous state compared with  $\beta$ -CD.

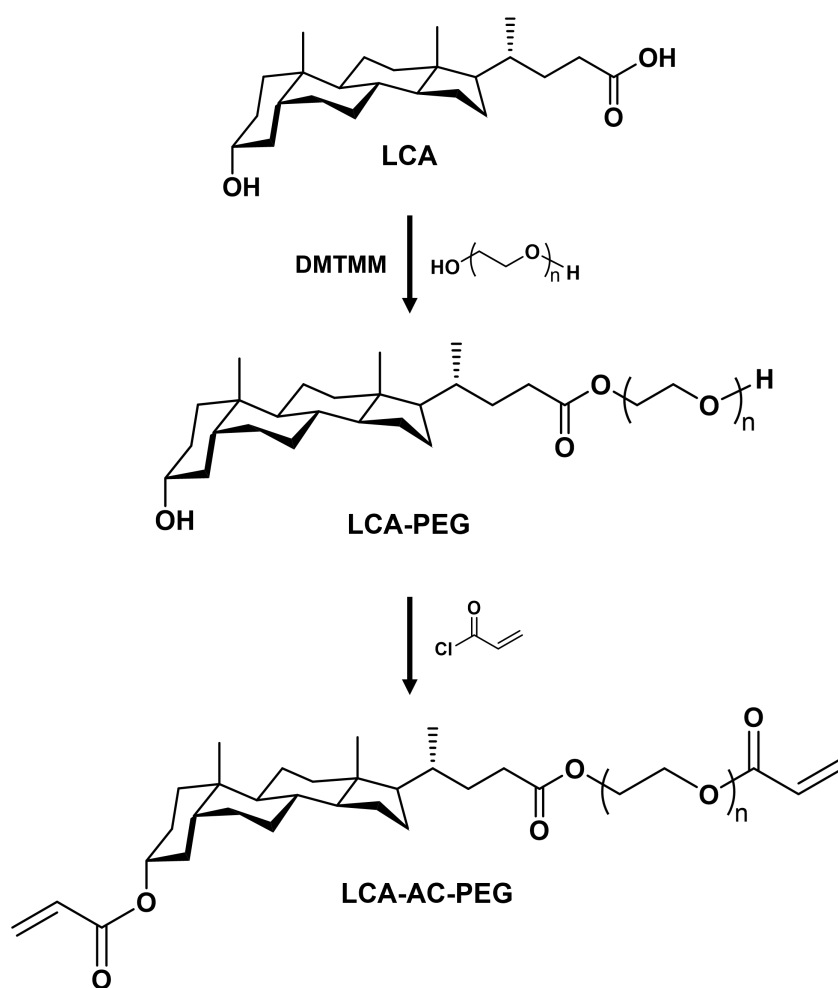

**Supplementary Fig. 11.** Synthesis route of LCA-AC-PEG.



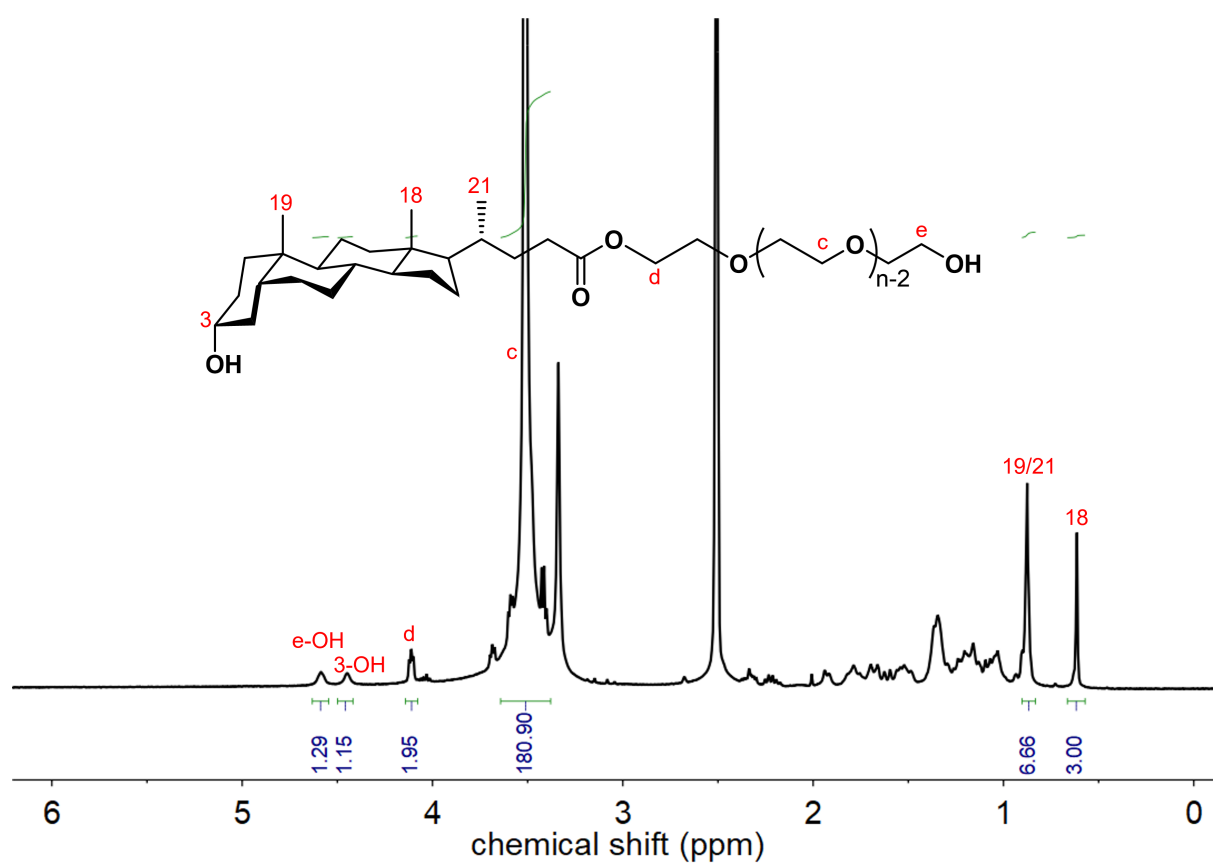

**Supplementary Fig. 12.**  $^1\text{H}$  NMR spectrum of LCA-PEG in  $\text{DMSO-d}_6$  and the assignment of peaks.

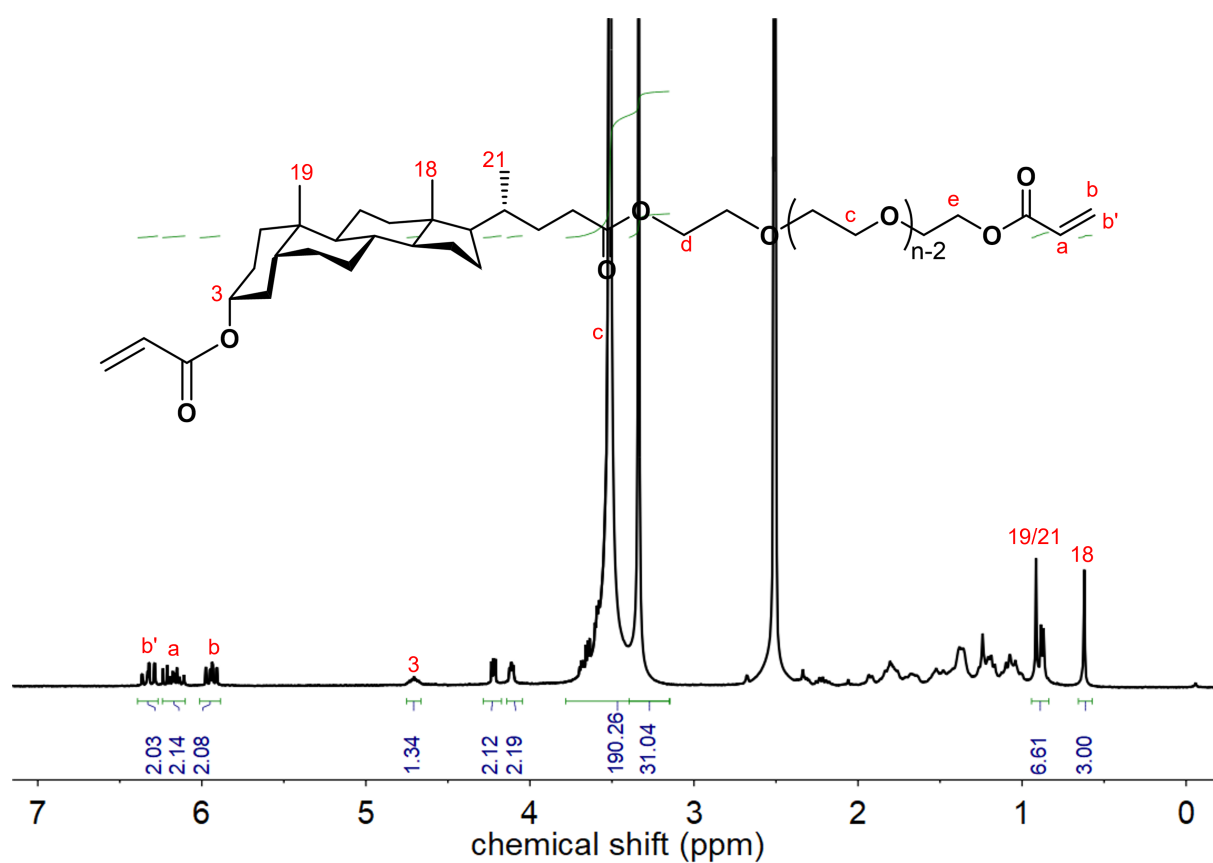

**Supplementary Fig. 13.**  $^1\text{H}$  NMR spectrum of LCA-AC-PEG in  $\text{DMSO-d}_6$  and the assignment of peaks.

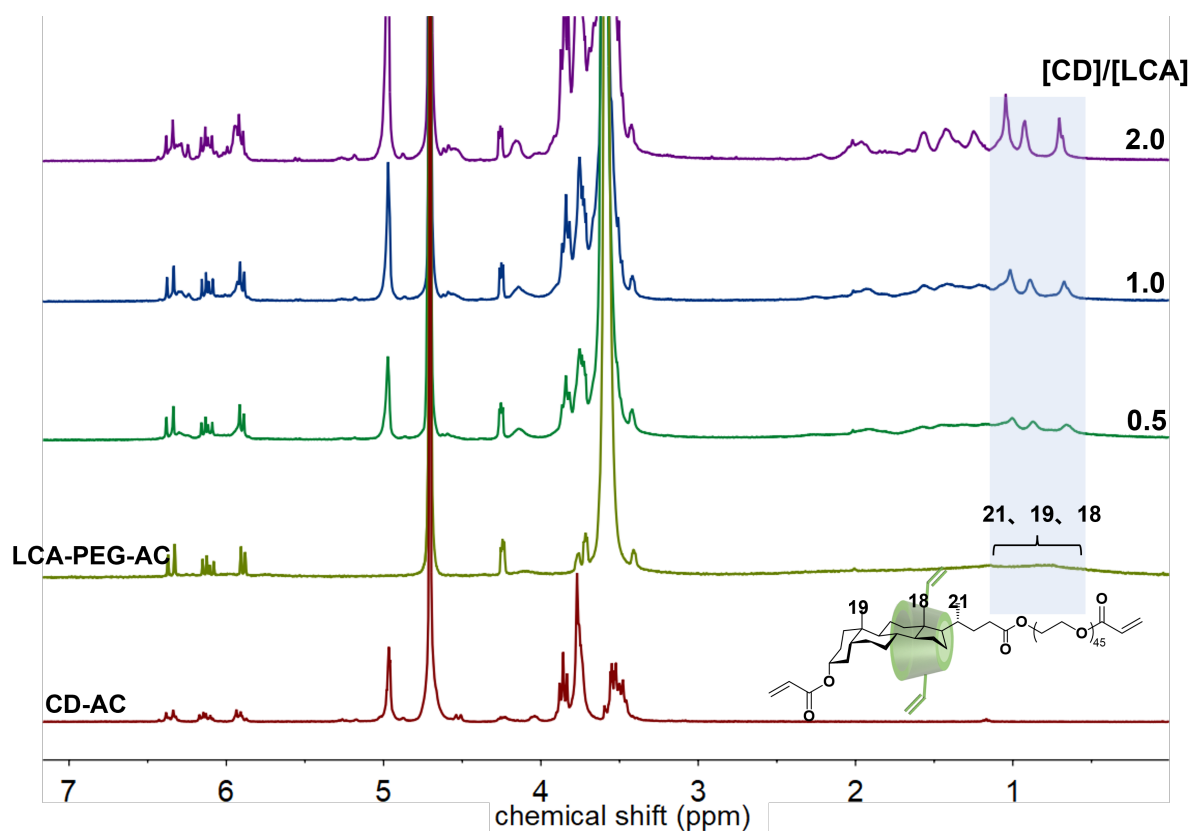

**Supplementary Fig. 14.**  $^1\text{H}$  NMR spectra of LCA-AC-PEG ( $\text{D}_2\text{O}$ ) in the presence of different equivalents of CD-AC. Signals of the three methyl protons on the LCA moieties all shift downfield and become sharper, indicating the formation of host-guest complex.

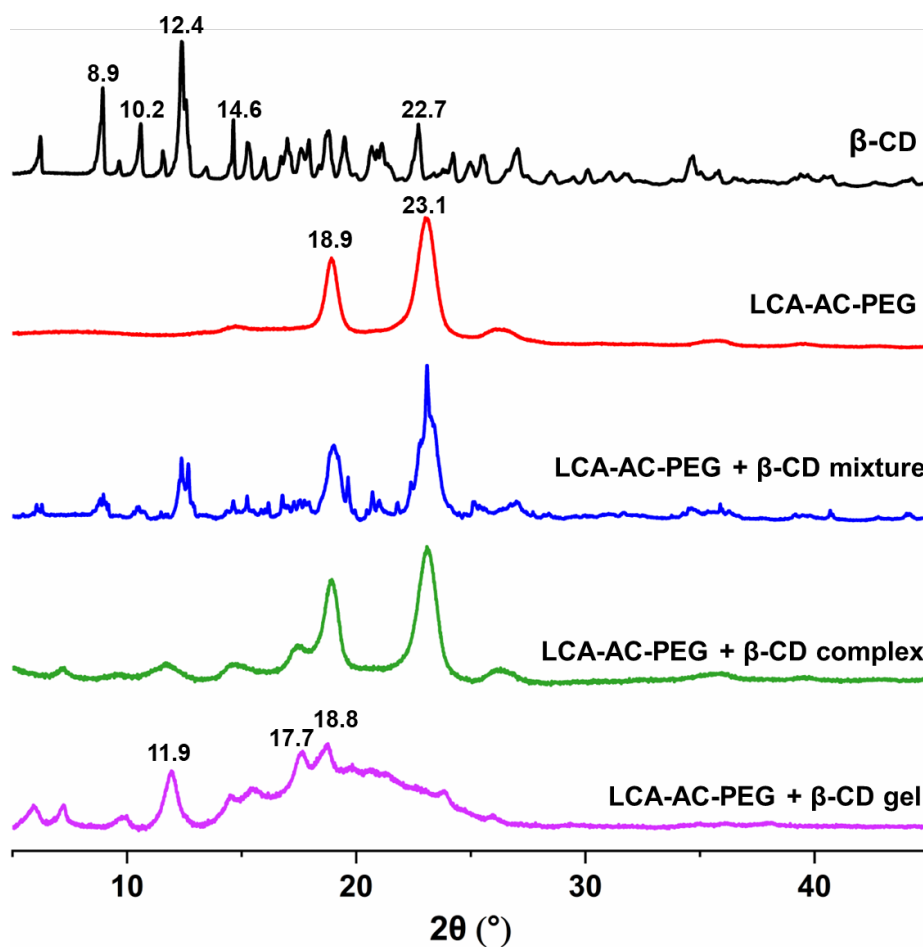

**Supplementary Fig. 15.** Powder XRD patterns of  $\beta$ -CD, LCA-AC-PEG, the mixture of  $\beta$ -CD with LCA-AC-PEG (1/1 mol.),  $\beta$ -CD/LCA-AC-PEG host-guest complex (1/1 mol.) and the polyacrylamide hydrogels crosslinked by  $\beta$ -CD/LCA-AC-PEG host-guest complex (1/1 mol.).

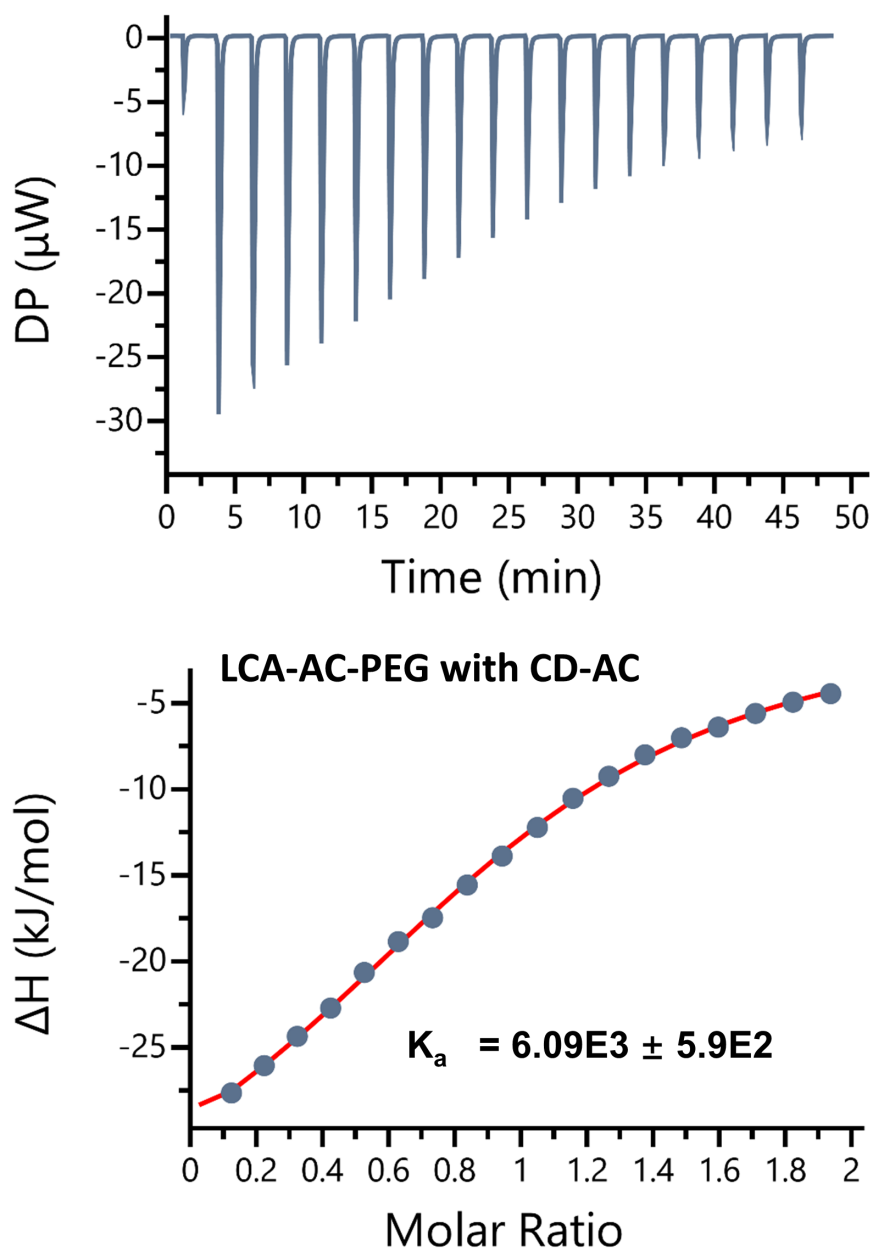

**Supplementary Fig. 16.** Apparent reaction heat in calorimetric titrations of CD-AC aqueous solution (5.0 mM) injecting into LCA-AC-PEG aqueous solution (0.5 mM) at 25 °C and their typical isothermal titration calorimetry (ITC) fitting curves.

**Supplementary Table 1.** Recipe of precursor solutions for the synthesis of conductive hydrogels. The total volume of the solution in each group was 1 mL.

| Hydrogels                  | Am<br>(g) | PR/Am<br>(mol%) | CD-AC/Am<br>(mol%) | MBA/Am<br>(mol%) | EG/Water<br>(vol.) | ChCl<br>(mmol) | I <sub>2959</sub> /Am<br>(mol%) |
|----------------------------|-----------|-----------------|--------------------|------------------|--------------------|----------------|---------------------------------|
| <b>PR-Gel</b><br>(20 w/v%) | 0.2       | 0.5             | 0                  | 0                | 1/1                | 3              | 1                               |
| PR-Gel<br>(30 w/v%)        | 0.3       | 0.5             | 0                  | 0                |                    |                |                                 |
| PR-Gel<br>(40 w/v%)        | 0.4       | 0.5             | 0                  | 0                |                    |                |                                 |
| <b>CD-Gel</b>              | 0.4       | 0               | 0.5                | 0                |                    |                |                                 |
| <b>MBA-Gel</b>             | 0.4       | 0               | 0                  | 0.5              |                    |                |                                 |

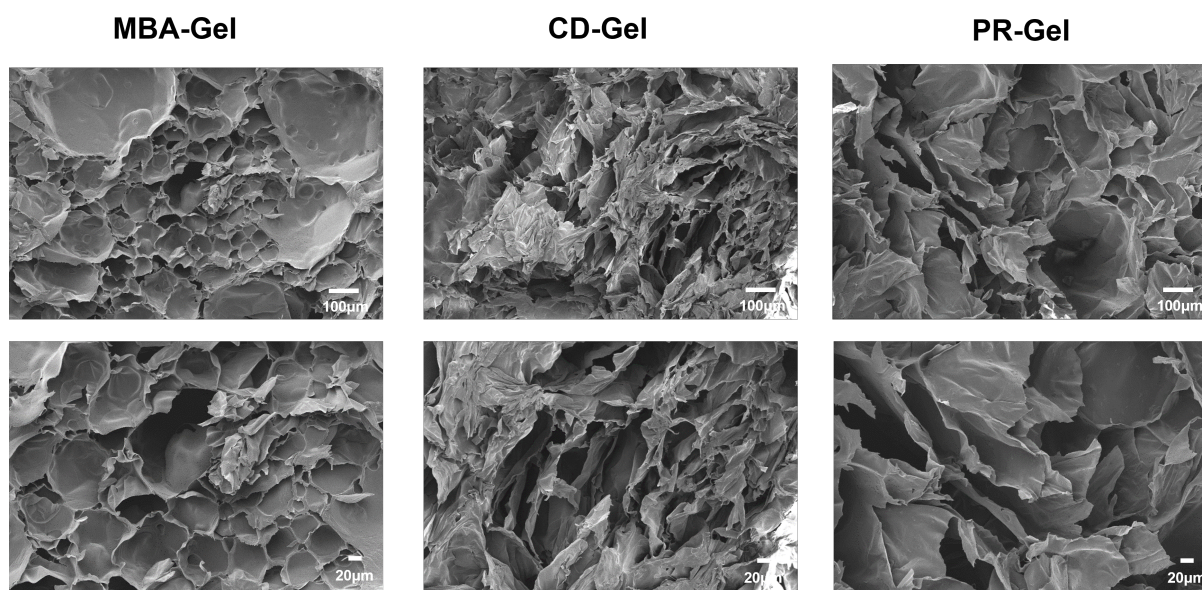

**Supplementary Fig. 17.** SEM images of lyophilized MBA-Gel, CD-Gel and PR-Gel with a concentration of Am 40 w/v% and their corresponding enlarged images.

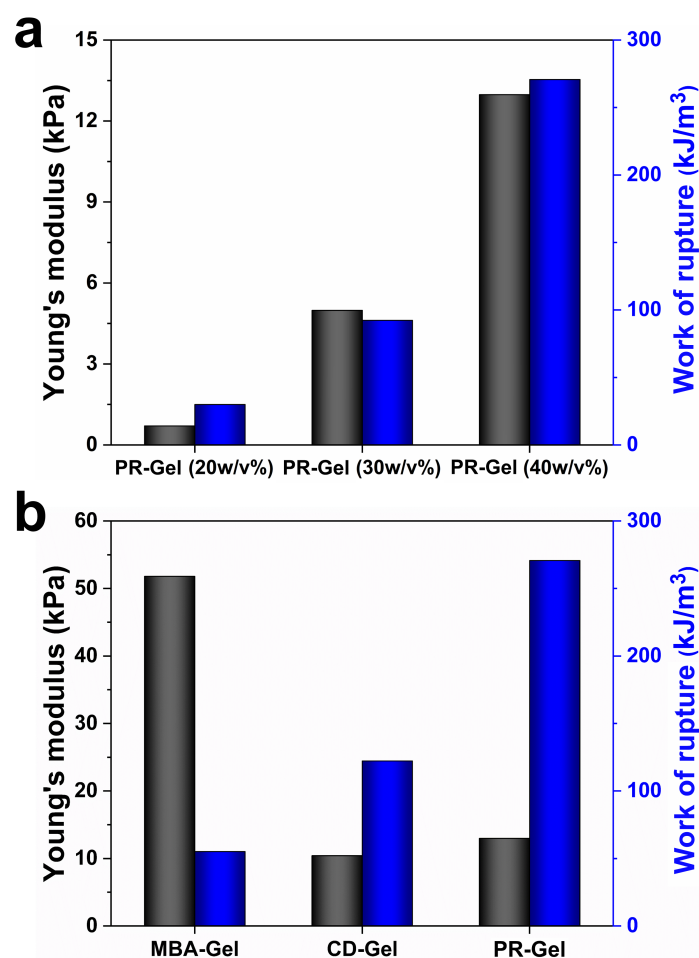

**Supplementary Fig. 18. Young's modulus and work of rupture.** (a) PR-Gel with different concentrations of Am and (b) gels with different crosslinkers at a concentration of Am 40 w/v%.



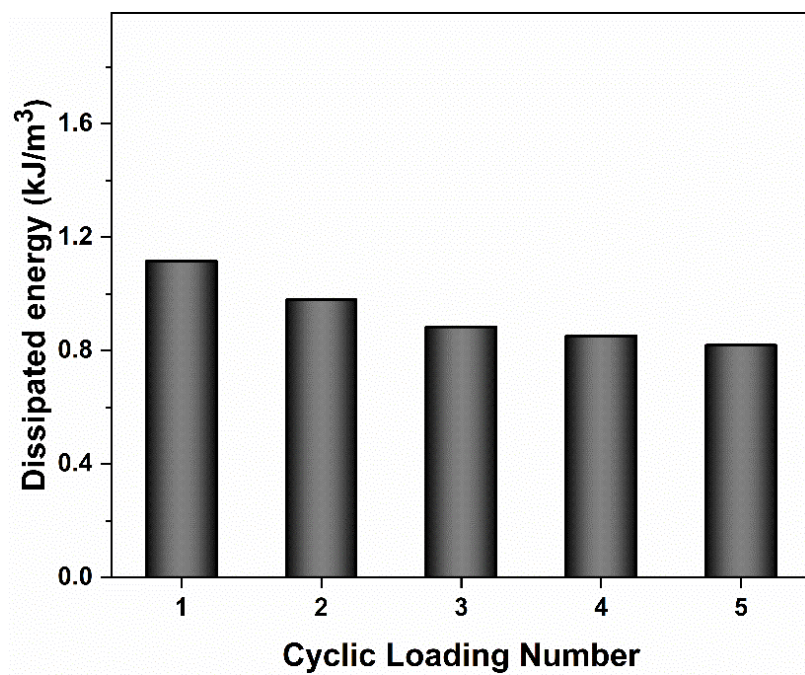

**Supplementary Fig. 19.** Dissipation energy of PR-Gel (40 w/v%) in 5 consecutive cycles of tensile at 300% strain.

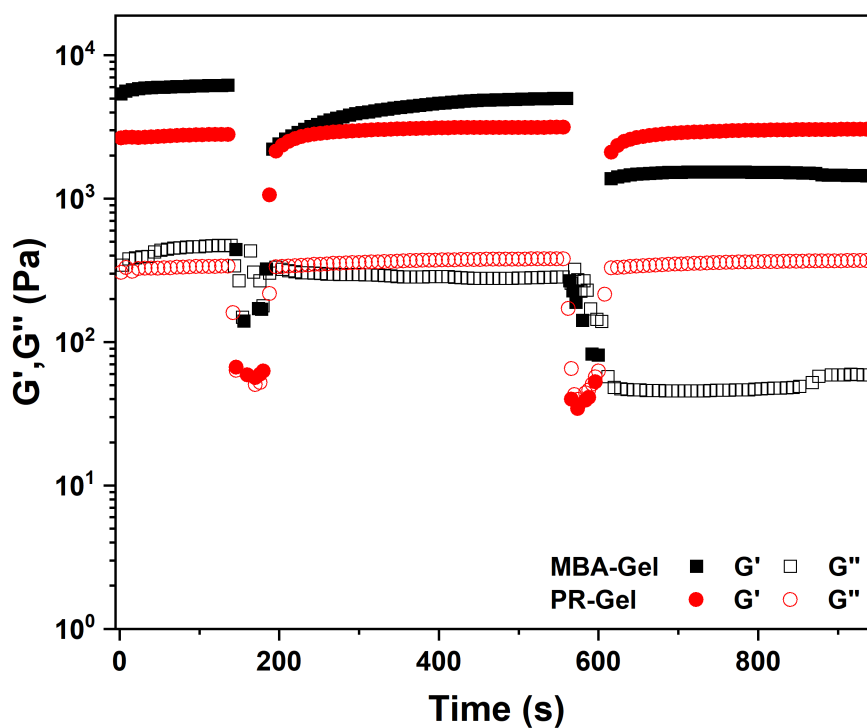

**Supplementary Fig. 20.** Storage modulus ( $G'$ ) and loss modulus ( $G''$ ) of PR-Gel and MBA-Gel with a concentration of Am 40 w/v% at alternate strains between subtle strain (1%) and large strain (500%).

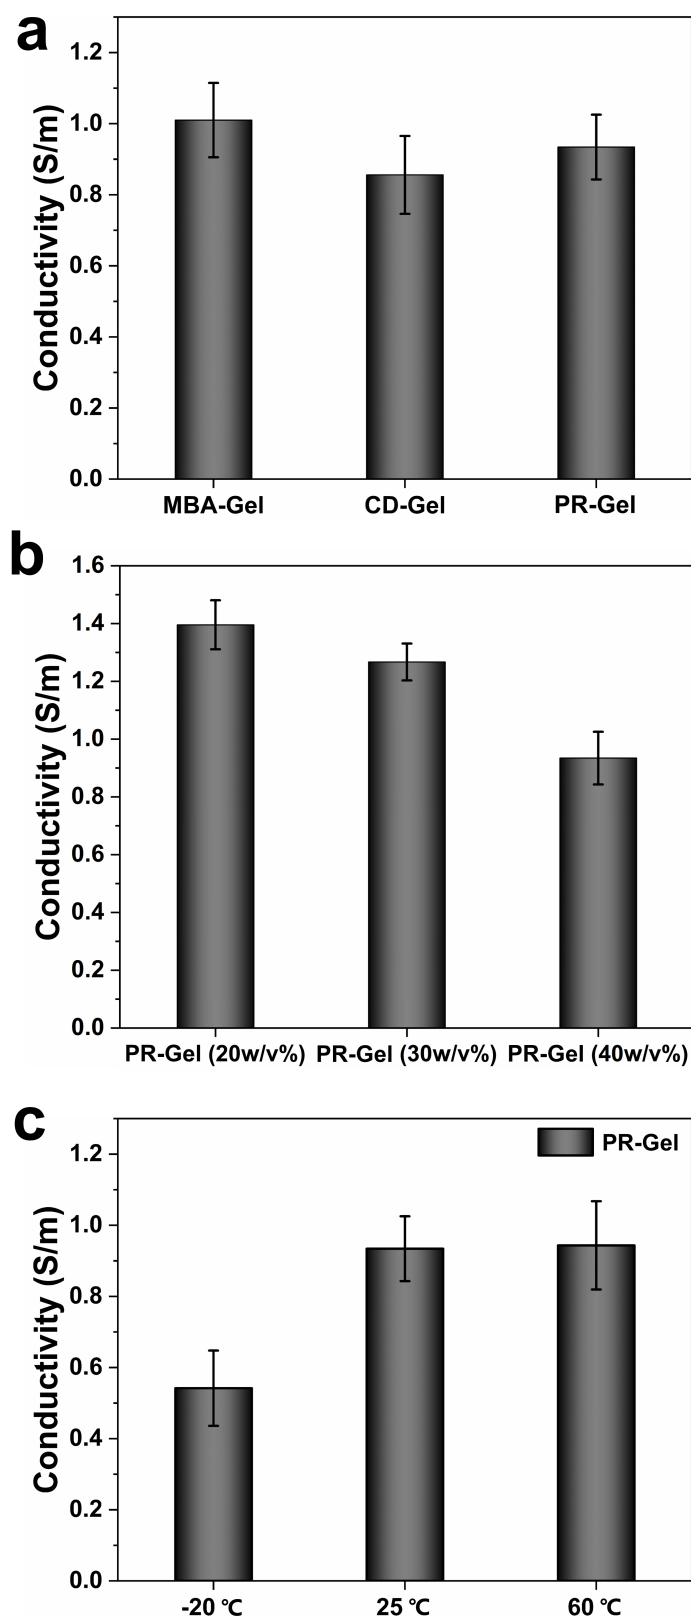

**Supplementary Fig. 21. Conductivity results.** (a) Conductivity of gels with different crosslinkers. (b) Conductivity of PR-Gel at different concentrations. (c) Conductivity of PR-Gel (40 w/v%) at different temperatures.

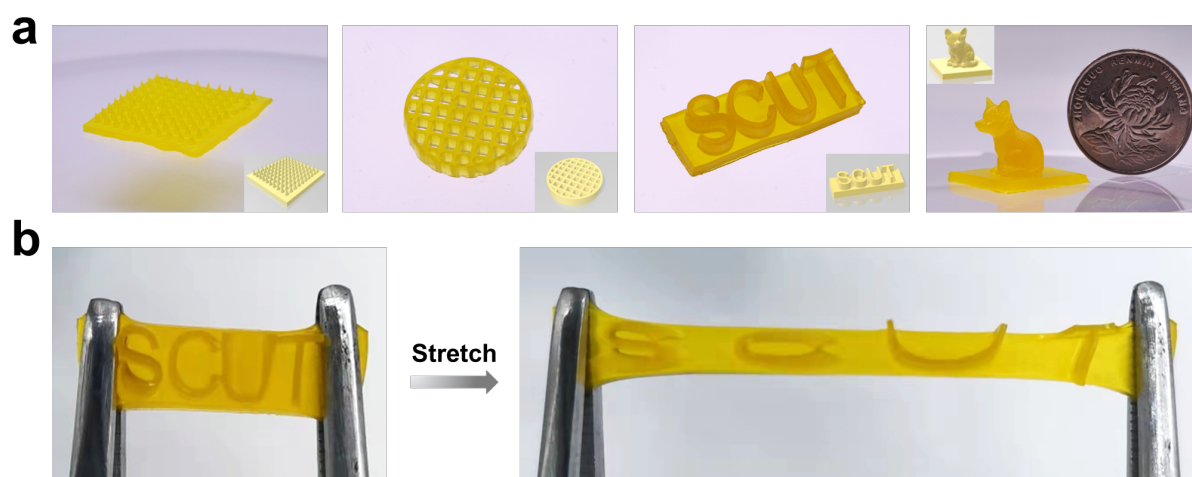

**Supplementary Fig. 22. 3D printed PR-Gel.** (a) PR-Gel (40 w/v%) based skeletons of various shapes fabricated with digital light processing (DLP) technology, and tartrazine as a dye. (b) Photographs of 3D printed PR-Gel (40 w/v%) before and after stretching.
